# Supplementary material
Source: PubMed Central journal article supplement (PMC3932764)
Supplement: NIHMS541955-supplement-1.pdf [file NIHMS541955-supplement-1.pdf]

## **Supplementary Information**

**for the manuscript**

### **CD1a autoreactive T cells recognize natural skin oils that function as headless antigens**

Annemieke de Jong, Tan-Yun Cheng, Shouxiong Huang, Stephanie Gras, Richard W. Birkinshaw, Anne Kasmar, Ildiko van Rhijn, Victor Peña-Cruz, Daniel T. Ruan, John D. Altman, Jamie Rossjohn, D. Branch Moody

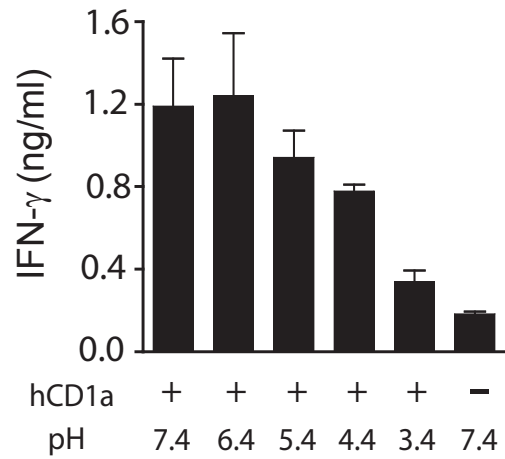

**Supplementary Figure 1.** Low pH promotes unloading of lipids from CD1a protein. Plate-bound CD1a protein was treated with citrate buffers of indicated pH. 24h after co-incubation of BC2 T cell line with pH-treated CD1a protein, T cell activation was measured in the supernatant by IFN $\gamma$  ELISA

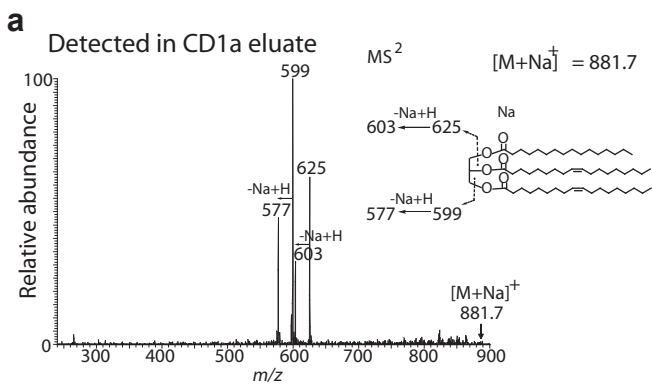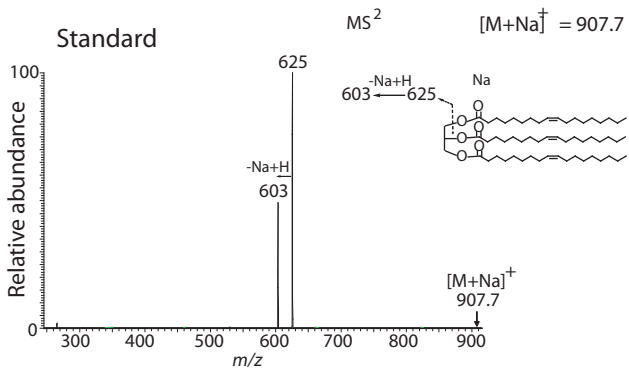

Positive mode analysis of  $MS^2$  spectra of (top)  $m/z = 881.7$ , detected in CD1a eluates and (bottom) triacylglycerol standard,  $m/z = 907.7$

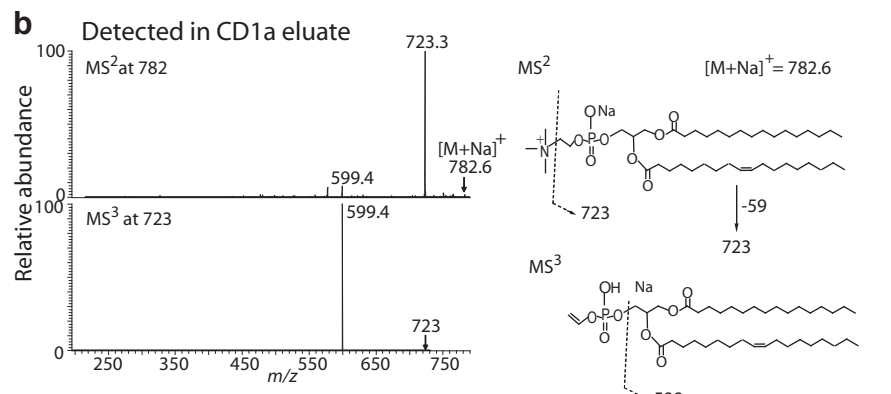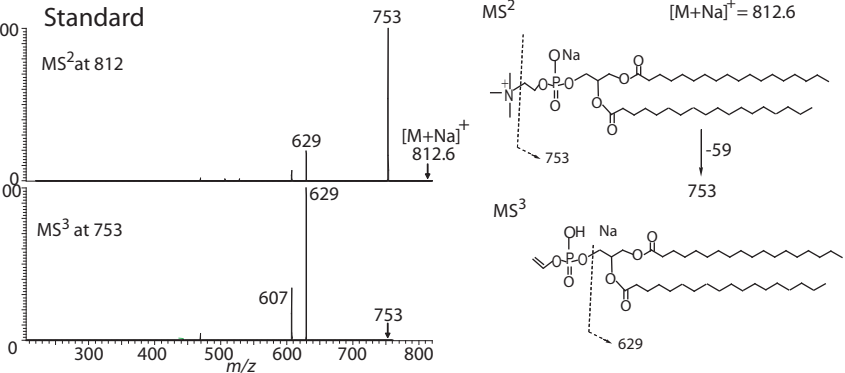

Positive mode analysis of  $MS^2$  and  $MS^3$  spectra of (top)  $m/z = 782.6$ , detected in CD1a eluates and (bottom) phosphatidylcholine standard,  $m/z = 812.6$

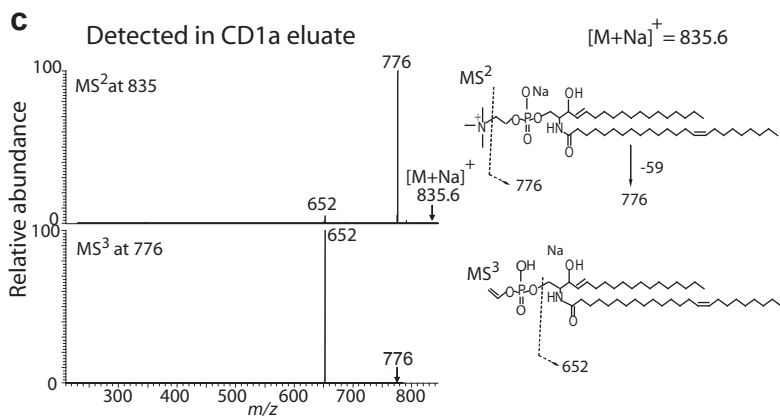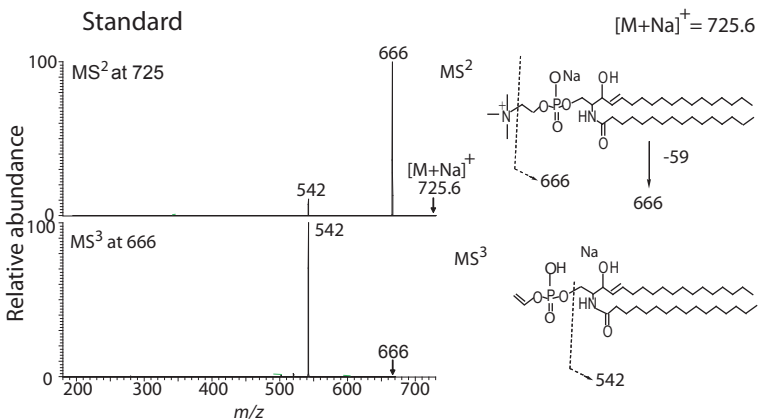

Positive mode analysis of  $MS^2$  and  $MS^3$  spectra of (top)  $m/z = 835.6$ , detected in CD1a eluates and (bottom) sphingomyelin standard,  $m/z = 725.6$

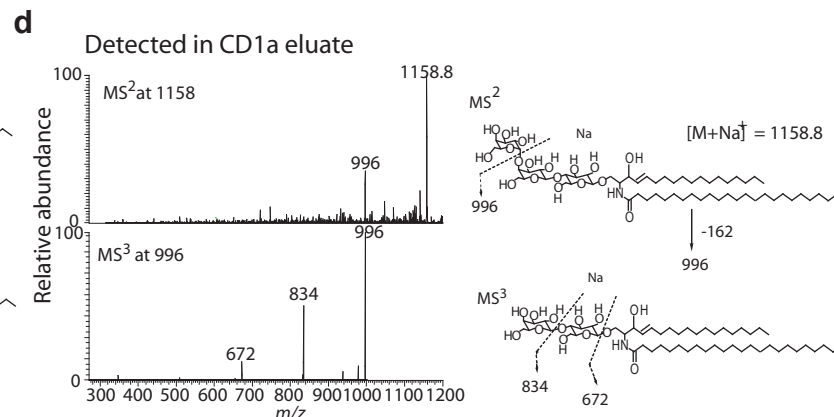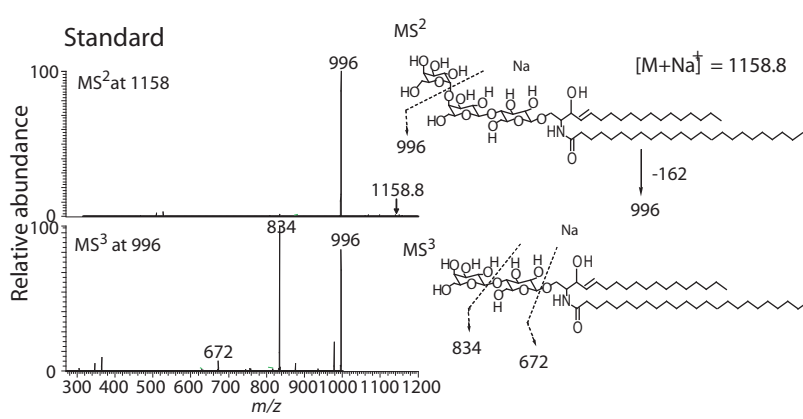

Positive mode analysis of  $MS^2$  and  $MS^3$  spectra of (top)  $m/z = 1158.8$ , detected in CD1a eluates and (bottom) trihexosylceramide standard,  $m/z = 1158.8$

**Supplementary Figure 2** Identification of lipids eluted from recombinant CD1a proteins by collision induced dissociation mass spectrometry and comparison with lipid standards (positive mode analysis)

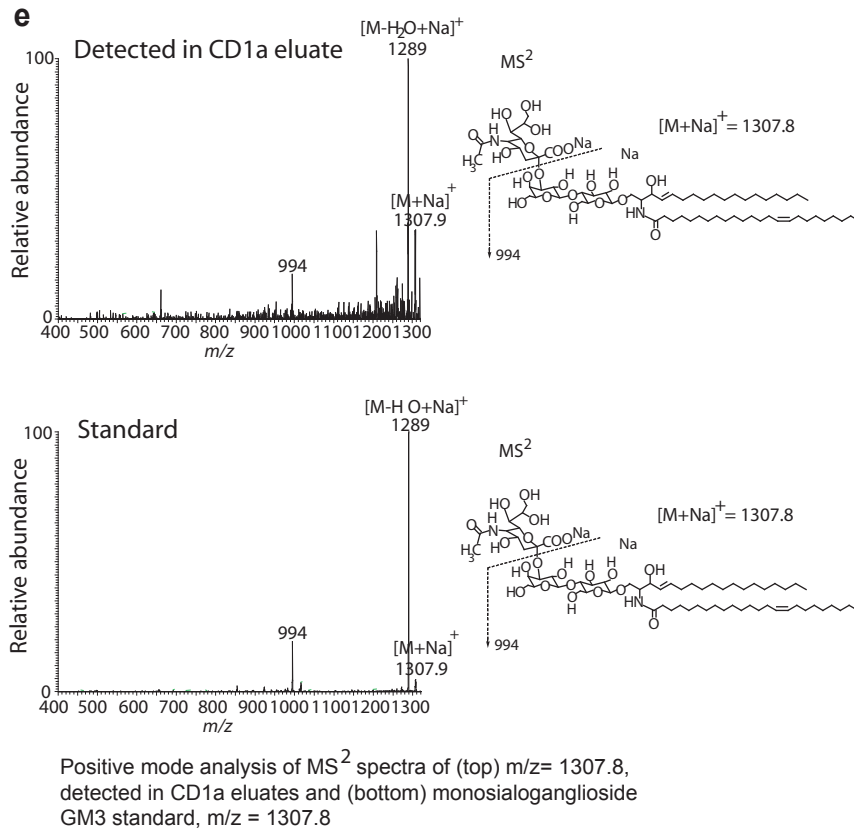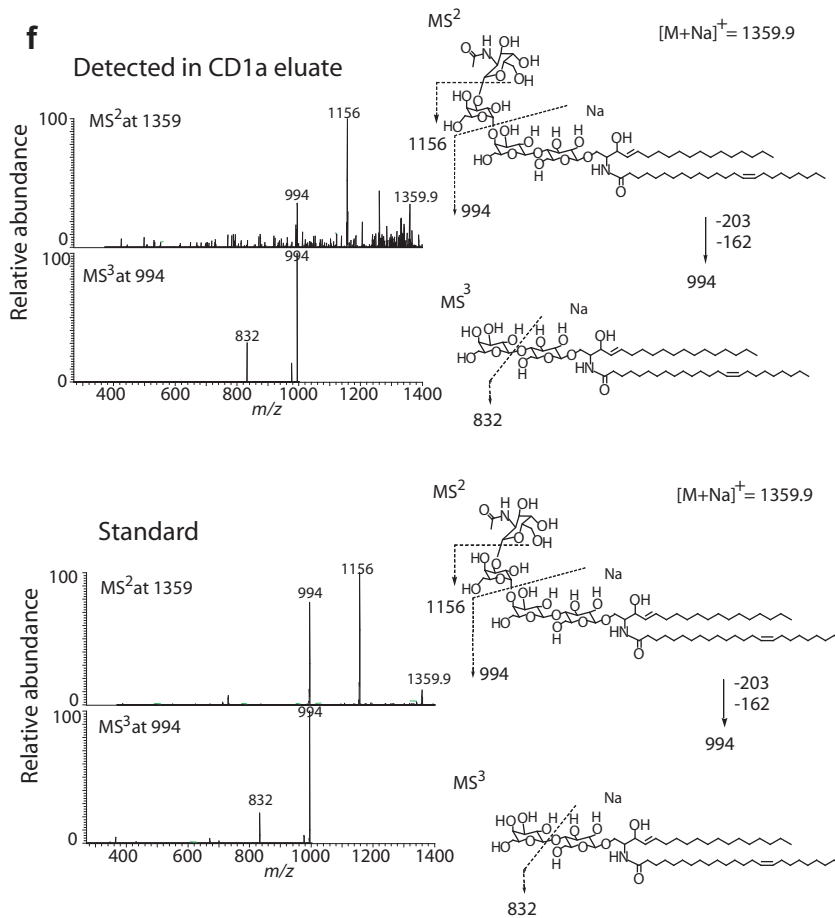

**Supplementary Figure 2** Identification of lipids eluted from recombinant CD1a proteins by collision induced dissociation mass spectrometry and comparison with lipid standards (positive mode analysis)

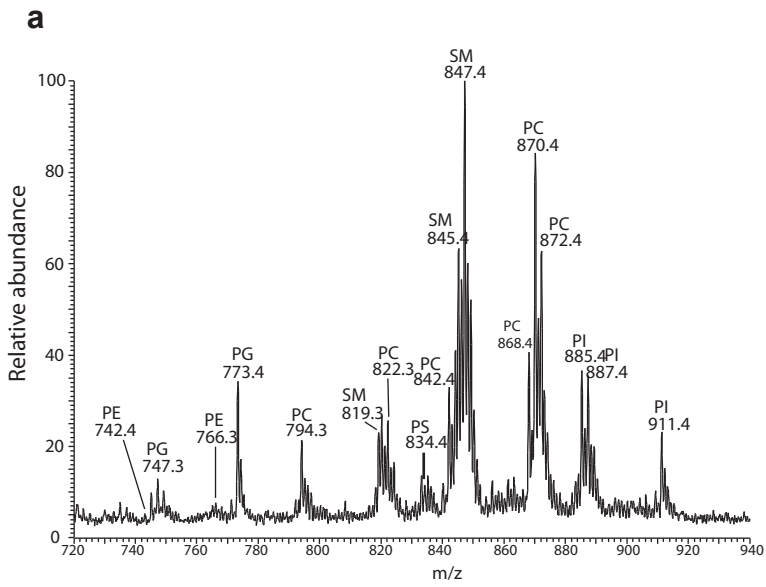

Negative-mode electrospray ionization mass spectrometry of CD1a eluate.

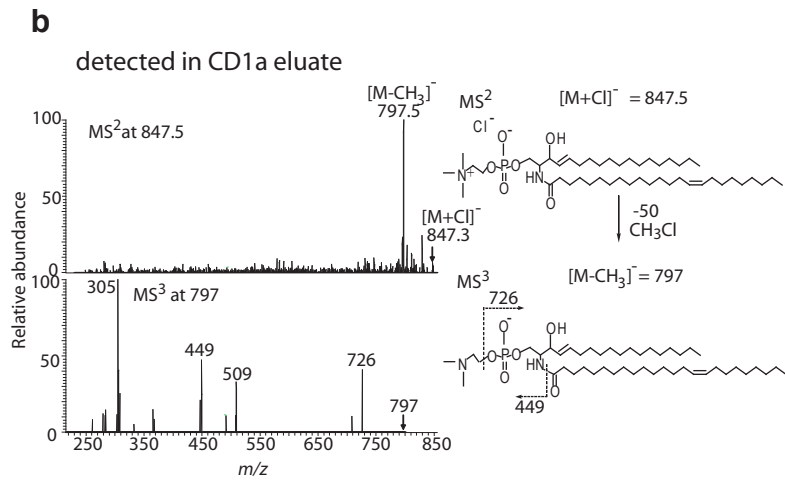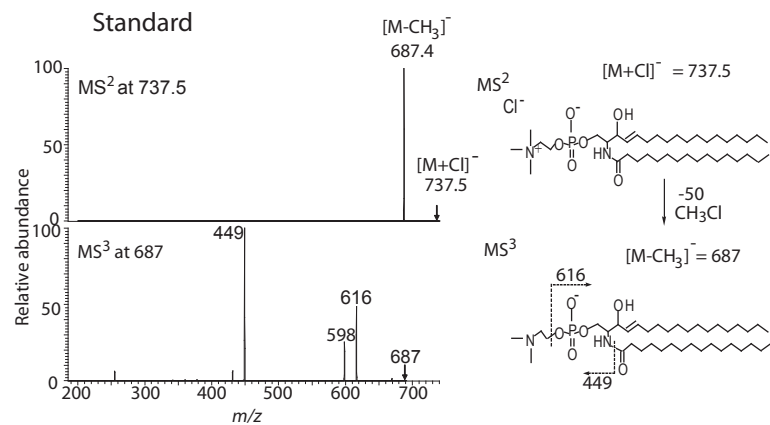

Negative mode analysis of  $MS^2$  and  $MS^3$  spectra of (top)  $m/z = 847.3$ , detected in CD1a eluates and (bottom) sphingomyelin standard,  $m/z = 737.5$

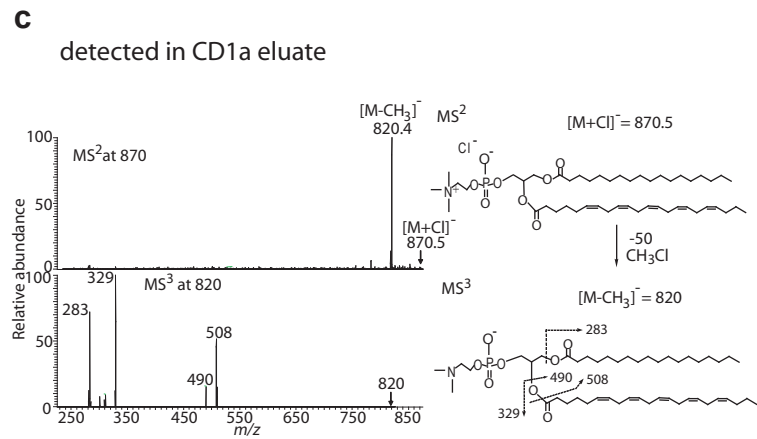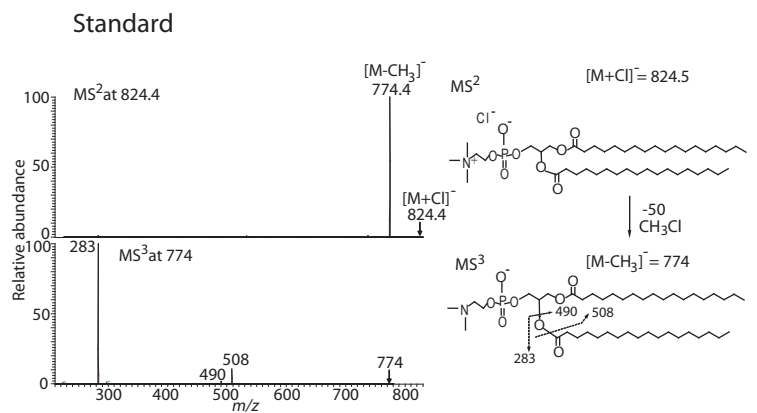

Negative mode analysis of  $MS^2$  and  $MS^3$  spectra of (top)  $m/z = 870.5$ , detected in CD1a eluates and (bottom) phosphatidylcholine standard,  $m/z = 824.4$

**Supplementary Figure 3** Identification of lipids eluted from recombinant CD1a proteins by collision induced dissociation mass spectrometry and comparison with lipid standards (negative mode analysis)

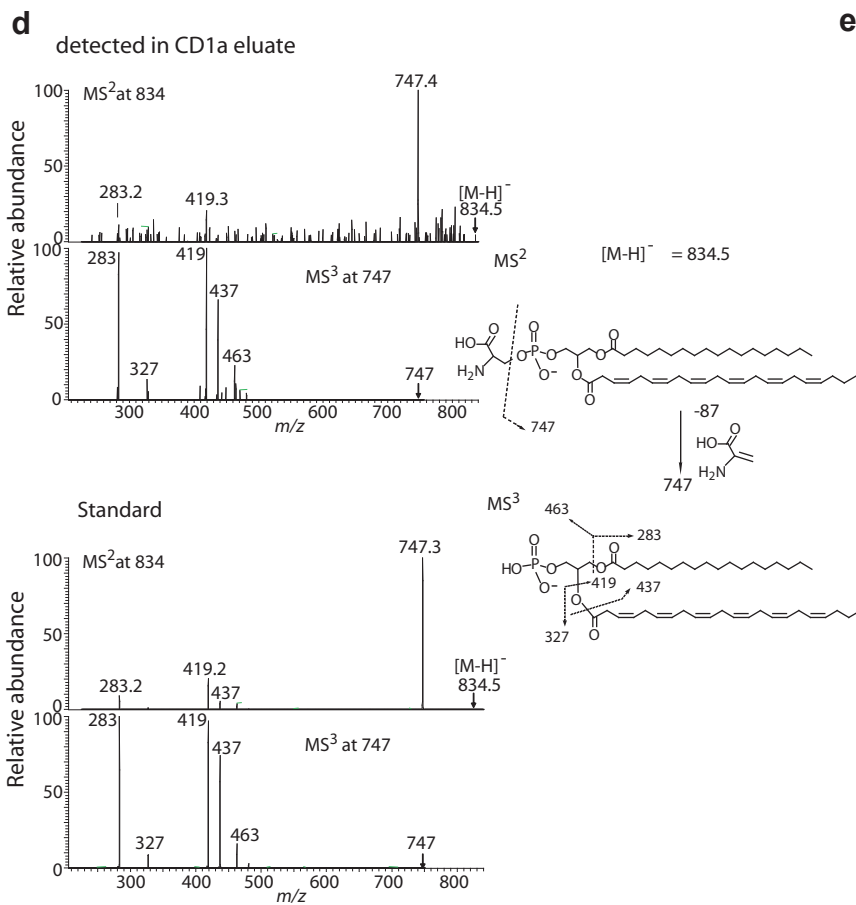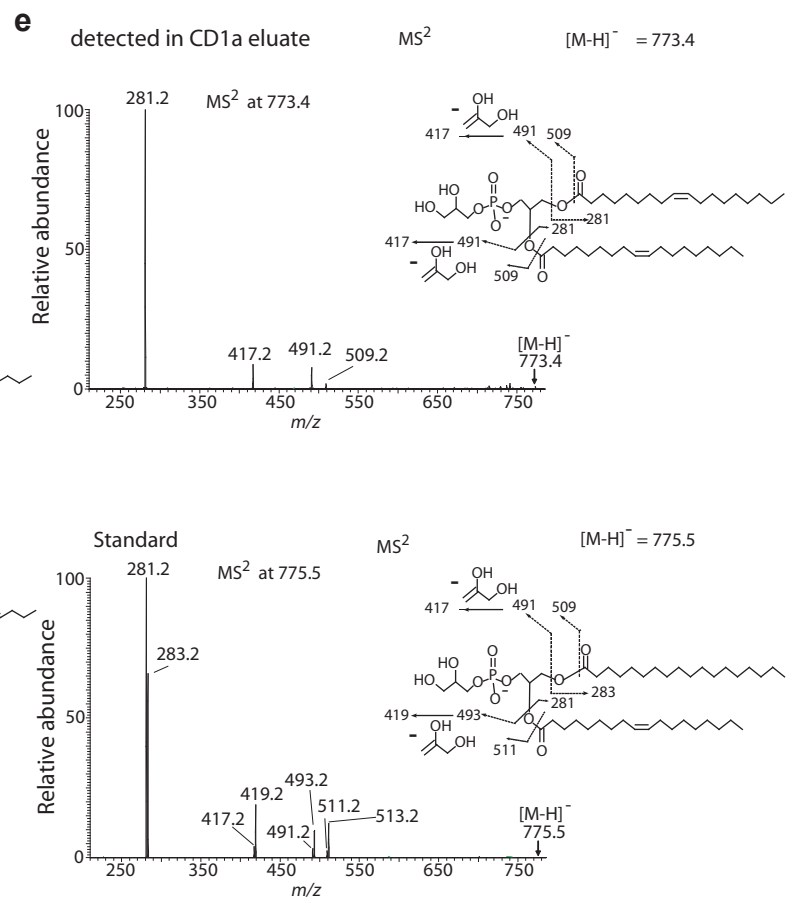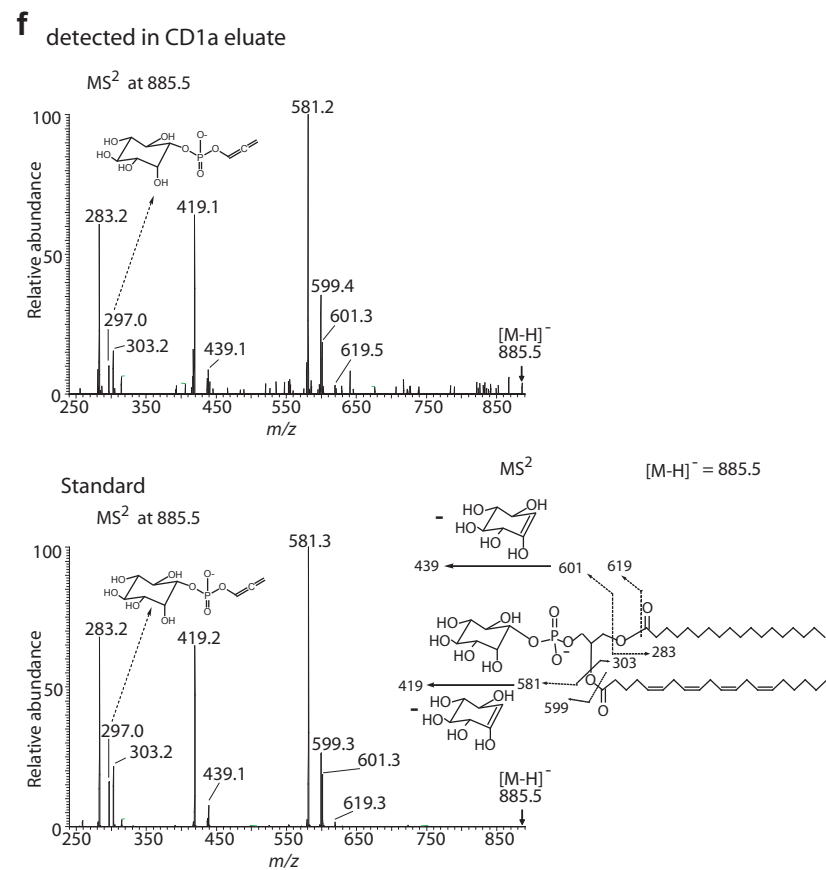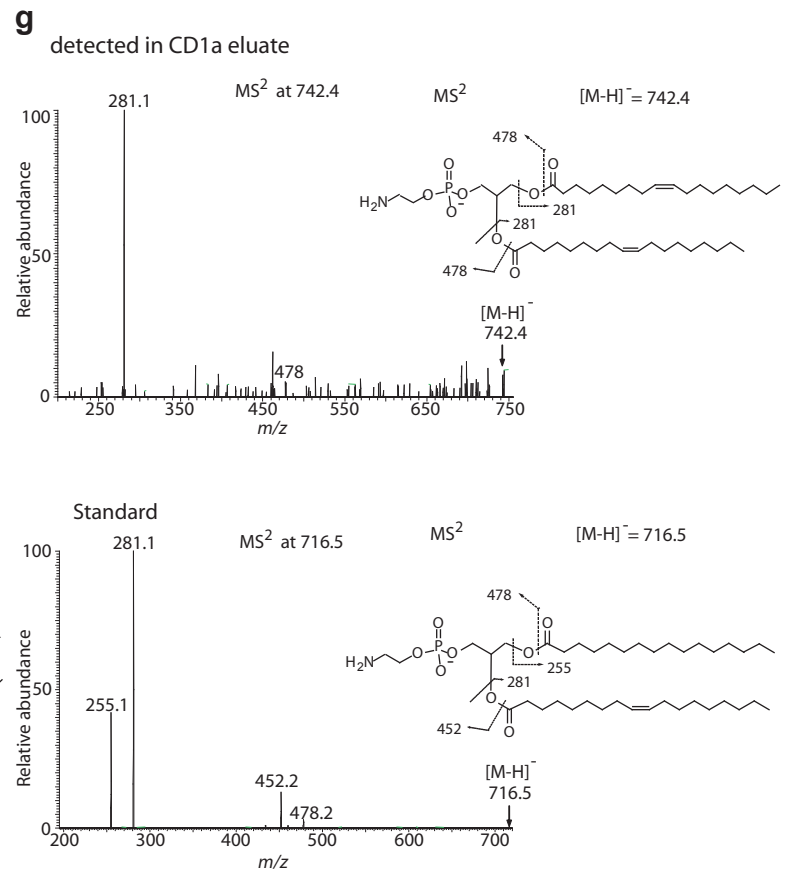

**Supplementary Figure 3** Identification of lipids eluted from recombinant CD1a proteins by collision induced dissociation mass spectrometry and comparison with lipid standards (negative mode analysis)

### Negative mode ESI-MS of fraction 2

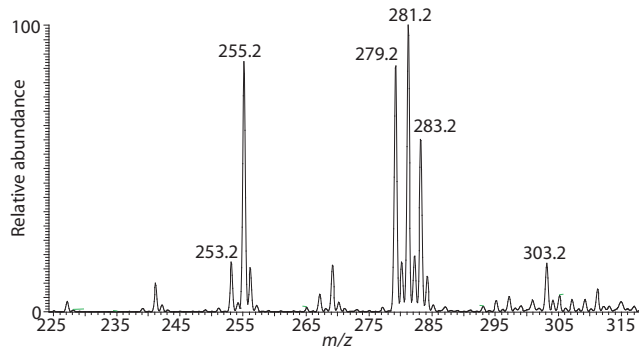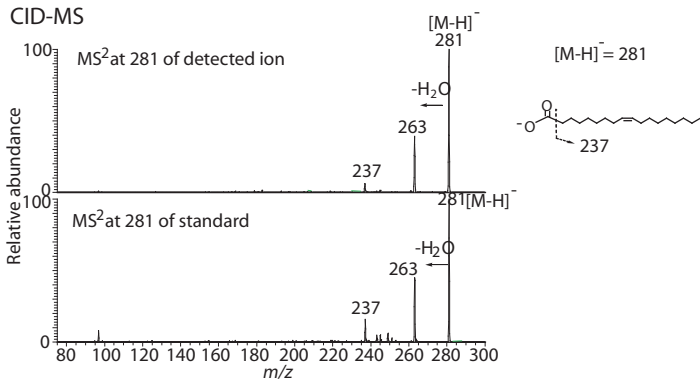

Fatty acids were major lipids found in fraction 2 of skin epidermal lipids purified by 1D TLC. (Top) Negative mode EIC-MS detected ions at  $m/z$  255.2, 279.2, 281.2, 283.2 etc., correspond to masses of C16:0, C18:2, C18:1, and C18:0 fatty acid, respectively. (Bottom) CID-MS of  $m/z=281.2$  (detected in fraction 2) vs.  $m/z=281.2$  (C18:1 fatty acid standard)

### Positive mode ESI-MS of fraction 3

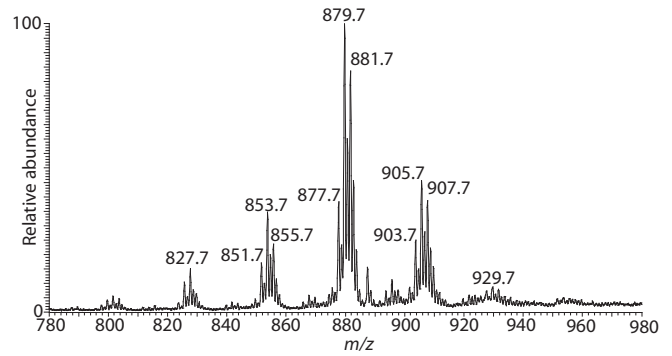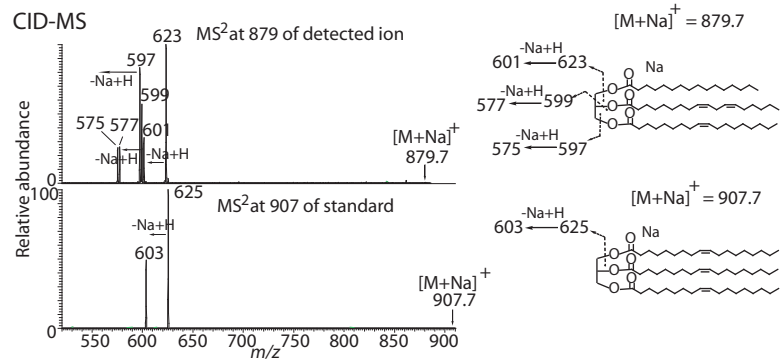

Triacylglycerols were major lipids found in fraction 3 of skin epidermal lipids purified by 1D TLC. (Top) Positive mode EIC-MS detected ions at  $m/z$  853.7, 879.7, 881.7, 905.7 etc., correspond to homologous series of triacylglycerol. (Bottom) CID-MS of  $m/z=879.7$  (detected in fraction 3) vs.  $m/z=907.7$  (triacylglycerol standard)

### Positive mode ESI-MS of fraction 3-4

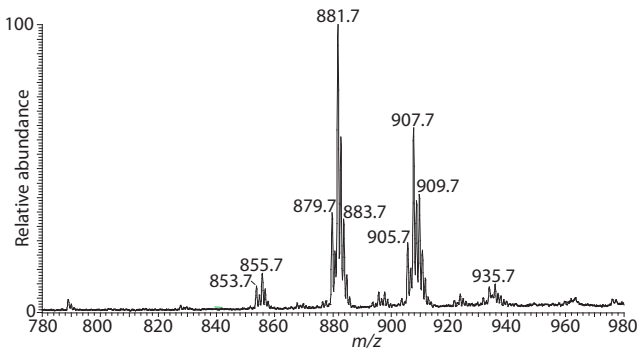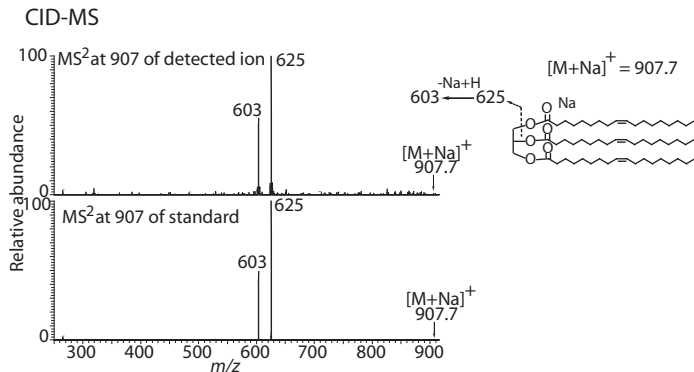

Triacylglycerols were major lipids found in fraction 3-4 of skin epidermal lipids purified by 1D TLC. (Top) Positive mode EIC-MS detected ions at  $m/z$  855.7, 879.7, 881.7, 907.7 etc., correspond to homologous series of triacylglycerol. (Bottom) CID-MS of  $m/z=907.7$  (detected in fraction 3-4) vs.  $m/z=907.7$  (triacylglycerol standard)

### Positive mode ESI-MS of fraction 4

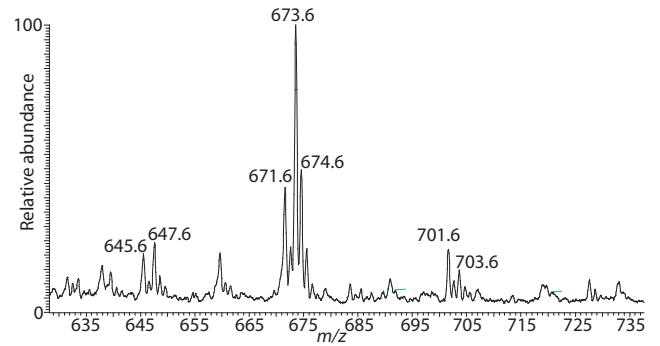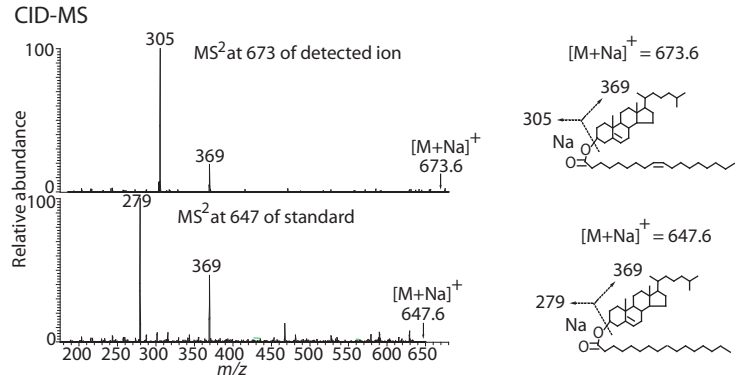

Cholesterol esters were major lipids found in fraction 4 of skin epidermal lipids purified by 1D TLC. (Top) Positive mode EIC-MS detected ions at  $m/z$  647.7, 671.6, 673.6, 701.6 etc., correspond to homologous series of cholesterol ester. (Bottom) CID-MS of  $m/z=673.6$  (detected in fraction 4) vs.  $m/z=647.6$  (cholesterol ester standard)

**Supplementary Figure 4** Electron spray ionization mass spectrometry of lipids eluted from silica fraction of TLC plate. Comparison of collision induced dissociation mass spectrometry profiles with lipid standards

|     | <b>TRAV</b> | <b>TRAJ</b> | <b>CDR3<math>\alpha</math></b> | <b>TRBV</b> | <b>TRBD</b> | <b>TRBJ</b> | <b>CDR3<math>\beta</math></b> |
|-----|-------------|-------------|--------------------------------|-------------|-------------|-------------|-------------------------------|
| BC2 | 26-1        | 34          | CIVPPPDKLIF                    | 29-1        | 1           | 1-2         | CSVEDIGQGAFDYGYTF             |
| Bgp | 21          | 33          | CAVLHSNYQLIW                   | 11-3        | 1           | 2-2         | CASSLDLGVLDEGTGELFF           |

**Supplementary table 5** T cell receptors of CD1a autoreactive T cell clones

To determine the sequence of the BC2 TCR  $\alpha$  and  $\beta$  chains, PCR was performed using the following primers: TRAV26-1LongF: atgaggctggtggcaagag; TRBV29LongF: catctctcaaagccaagcagg; CalphaShortRev: catgtctagcacagttttg; CbetaConstRevForSeq: ggtggcagacaggacccttgc.

PCR products were sequenced from both sides using the PCR primers.

To determine the sequence of the Bgp TCR  $\alpha$  and  $\beta$  chain, a published method was used, based on circularization of double stranded cDNA and amplification using constant region primers (Uematsu, Y. A novel and rapid cloning method for the T cell receptor variable region sequences. 1991, Immunogenetics)

Genbank: TCR  $\alpha$  and  $\beta$  chain sequences of BC2 and Bgp clones: KF751594, KF751595, KF751596, KF751597
